# Supplementary material
Source: PubMed Central journal article supplement (PMC8855951)
Supplement: ccm-50-0398-s001.pdf [file ccm-50-0398-s001.pdf]

## SUPPLEMENTARY MATERIAL

### Appendix 1. Institutional Review Boards and Ethics Committees

|                                                          |                                                                                                                              |               |
|----------------------------------------------------------|------------------------------------------------------------------------------------------------------------------------------|---------------|
| Comitato Etico dell'IRCCS San Matteo di Pavia            | Comitato Etico dell'IRCCS San Matteo di Pavia, IRCCS Policlinico San Matteo, Viale Golgi, 19, 27100, Pavia, Lombardia, Italy | Italy         |
| Advarra                                                  | Advarra, 6940 Columbia Gateway Drive, Columbia, MD, 21046, United States                                                     | United States |
| CPP Sud Ouest et Outre Mer I                             | CPP Sud Ouest et Outre Mer I, 10 Chemin du Raisin, ARS Midi-Pyrénées, Bureau 1028, 31050, Toulouse cedex 9, France           | France        |
| CPP Sud Ouest et Outre Mer I                             | CPP Sud Ouest et Outre Mer I, 10 Chemin du Raisin, ARS Midi-Pyrénées, Bureau 1028, 31050, Toulouse cedex 9, France           | France        |
| CEIC Área 5: Hospital Universitario la Paz               | CEIC Área 5: Hospital Universitario la Paz, Paseo de la Castellana, 261, 28036, Madrid, Spain                                | Spain         |
| CEIC Área 5: Hospital Universitario la Paz               | CEIC Área 5: Hospital Universitario la Paz, Paseo de la Castellana, 261, 28036, Madrid, Spain                                | Spain         |
| CEIC Área 5: Hospital Universitario la Paz               | CEIC Área 5: Hospital Universitario la Paz, Paseo de la Castellana, 261, 28036, Madrid, Spain                                | Spain         |
| CEIC Área 5: Hospital Universitario la Paz               | CEIC Área 5: Hospital Universitario la Paz, Paseo de la Castellana, 261, 28036, Madrid, Spain                                | Spain         |
| Comité d'Éthique de la Recherche                         | Comité d'Éthique de la recherche, CHUM, Pavillion R, 900 Rue St-Denis, 3rd Floor, H2X 0A9, Montreal, Quebec, Canada          | Canada        |
| Advarra                                                  | Advarra, 6940 Columbia Gateway Drive, Columbia, MD, 21046, United States                                                     | United States |
| Advarra                                                  | Advarra, 6940 Columbia Gateway Drive, Columbia, MD, 21046, United States                                                     | United States |
| Advarra                                                  | Advarra, 6940 Columbia Gateway Drive, Columbia, MD, 21046, United States                                                     | United States |
| Stichting Beoordeling Ethiek Biomedisch Onderzoek (BEBO) | Stichting Beoordeling Ethiek Biomedisch Onderzoek (BEBO), Dr. Nassaulaan 10, 9401 HK, Assen, Netherlands                     | Netherlands   |

|                                                                  |                                                                                                                                             |                |
|------------------------------------------------------------------|---------------------------------------------------------------------------------------------------------------------------------------------|----------------|
| Stichting Beoordeling Ethiek Biomedisch Onderzoek (BEBO)         | Stichting Beoordeling Ethiek Biomedisch Onderzoek (BEBO), Dr. Nassaulaan 10, 9401 HK, Assen, Netherlands                                    | Netherlands    |
| West Midlands: Coventry & Warwickshire Research Ethics Committee | West Midlands: Coventry & Warwickshire Research Ethics Committee, The Old Chapel, Royal Standard Place, Nottingham, NG1 6FS, United Kingdom | United Kingdom |
| Ethikkommission der Medizinischen Fakultät Universität zu Köln   | Ethikkommission der Medizinischen Fakultät Universität zu Köln, Kerpener Str. 62, Gebäude 5, 50937, Köln, Germany                           | Germany        |
| Ethikkommission der Medizinischen Fakultät Universität zu Köln   | Ethikkommission der Medizinischen Fakultät Universität zu Köln, Kerpener Str. 62, Gebäude 5, 50937, Köln, Germany                           | Germany        |
| Ethikkommission der Medizinischen Fakultät Universität zu Köln   | Ethikkommission der Medizinischen Fakultät Universität zu Köln, Kerpener Str. 62, Gebäude 5, 50937, Köln, Germany                           | Germany        |
| Advarra                                                          | Advarra, 6940 Columbia Gateway Drive, Columbia, MD, 21046, United States                                                                    | United States  |
| University Health Network Research Ethics Board                  | University Health Network Research Ethics Board, 700 Bay Street, 17th Floor, Suite 1700, M5G 1Z6, Toronto, Ontario, Canada                  | Canada         |
| CPP Sud Ouest Et Outre Mer I                                     | CPP Sud Ouest Et Outre Mer I, 10 Chemin du Raisin, ARS Midi-Pyrénées, Bureau 1028, 31050, Toulouse cedex 9, France                          | France         |
| CPP Sud Ouest Et Outre Mer I                                     | CPP Sud Ouest Et Outre Mer I, 10 Chemin du Raisin, ARS Midi-Pyrénées, Bureau 1028, 31050, Toulouse cedex 9, France                          | France         |
| CPP Sud Ouest Et Outre Mer I                                     | CPP Sud Ouest Et Outre Mer I, 10 Chemin du Raisin, ARS Midi-Pyrénées, Bureau 1028, 31050, Toulouse cedex 9, France                          | France         |
| CPP Sud Ouest Et Outre Mer I                                     | CPP Sud Ouest Et Outre Mer I, 10 Chemin du Raisin, ARS Midi-Pyrénées, Bureau 1028, 31050, Toulouse cedex 9, France                          | France         |
| Videnskabsetiske Komité Region Midt                              | Videnskabsetiske Komité Region Midt, Sundhedssekr., Skottenborg 26, Postboks 21, 8800, Viborg, Denmark                                      | Denmark        |
| Videnskabsetiske Komité Region Midt                              | Videnskabsetiske Komité Region Midt, Sundhedssekr., Skottenborg                                                                             | Denmark        |

|                                                                                                        |                                                                                                                                                          |             |
|--------------------------------------------------------------------------------------------------------|----------------------------------------------------------------------------------------------------------------------------------------------------------|-------------|
|                                                                                                        | 26, Postboks 21, 8800, Viborg,<br>Denmark                                                                                                                |             |
| Videnskabsetiske Komité<br>Region Midt                                                                 | Videnskabsetiske Komité Region<br>Midt, Sundhedssekr., Skottenborg<br>26, Postboks 21, 8800, Viborg,<br>Denmark                                          | Denmark     |
| Videnskabsetiske Komité<br>Region Midt                                                                 | Videnskabsetiske Komité Region<br>Midt, Sundhedssekr., Skottenborg<br>26, Postboks 21, 8800, Viborg,<br>Denmark                                          | Denmark     |
| CPP Sud Ouest Et Outre Mer                                                                             | CPP Sud Ouest Et Outre Mer I, 10<br>chemin du raisin, ARS Midi-<br>Pyrénées, Bureau 1028, 31050,<br>Toulouse cedex 9, France                             | France      |
| Comitato Etico Brianza                                                                                 | Comitato Etico Brianza, Via<br>Pergolesi, 33, 20900, Monza,<br>Lombardia, Italy                                                                          | Italy       |
| Hamilton Integrated Research<br>Ethics Board                                                           | Hamilton Integrated Research Ethics<br>Board, 293 Wellington St. North,<br>Suite 102, L8L 8E7, Hamilton,<br>Ontario, Canada                              | Canada      |
| Hamilton Integrated Research<br>Ethics Board                                                           | Hamilton Integrated Research Ethics<br>Board, 293 Wellington St. North,<br>Suite 102, L8L 8E7, Hamilton,<br>Ontario, Canada                              | Canada      |
| Comitato Etico della Seconda<br>Università di Napoli; Az. Osp.<br>Univ. S.U.N., A.O.R.N.<br>"Ospedali" | Comitato Etico della Seconda<br>Università di Napoli, Az. Osp. Univ.<br>S.U.N., A.O.R.N. "Ospedali," Via<br>Costantinopoli, 104, 80138, Napoli,<br>Italy | Italy       |
| Comitato Etico Ist. Naz. Mal.<br>Inf. L. Spallanzani                                                   | Comitato Etico Ist. Naz. Mal. Inf. L.<br>Spallanzani, Via Portuense, 292,<br>149, Roma, Italy                                                            | Italy       |
| Comitato Etico Della Provincia<br>di Bergamo                                                           | Comitato Etico della Provincia di<br>Bergamo, Piazza OMS-<br>Organizzazione Mondiale della<br>Sanità, 1, 24127, Bergamo, Italy                           | Italy       |
| Comitato Etico Milano Area 1,<br>c/o ASST FBF Sacco, P.O. L.<br>Sacco                                  | Comitato Etico Milano Area 1, c/o<br>ASST FBF Sacco, P.O. L. Sacco,<br>Via G.B. Grassi, 74, 20157, Milano,<br>Italy                                      | Italy       |
| Hamilton Integrated Research<br>Ethics Board                                                           | Hamilton Integrated Research Ethics<br>Board, 293 Wellington St. North,<br>Suite 102, L8L 8E7, Hamilton,<br>Canada                                       | Canada      |
| Stichting Beoordeling Ethiek<br>Biomedisch Onderzoek<br>(BEBO)                                         | Stichting Beoordeling Ethiek<br>Biomedisch Onderzoek (BEBO), Dr.                                                                                         | Netherlands |

|                                                                        |                                                                                                                                                         |                |
|------------------------------------------------------------------------|---------------------------------------------------------------------------------------------------------------------------------------------------------|----------------|
|                                                                        | Nassaulaan 10, 9401 HK, Assen,<br>Netherlands                                                                                                           |                |
| Stichting Beoordeling Ethiek<br>Biomedisch Onderzoek<br>(BEBO)         | Stichting Beoordeling Ethiek<br>Biomedisch Onderzoek (BEBO), Dr.<br>Nassaulaan 10, 9401 HK, Assen,<br>Netherlands                                       | Netherlands    |
| CEIC Área 5: Hospital<br>Universitario la Paz                          | CEIC Área 5: Hospital Universitario<br>la Paz, Paseo de la Castellana, 261,<br>28036, Madrid, Spain                                                     | Spain          |
| CEIC Área 5: Hospital<br>Universitario la Paz                          | CEIC Área 5: Hospital Universitario<br>la Paz, Paseo de la Castellana, 261,<br>28036, Madrid, Spain                                                     | Spain          |
| CEIC Área 5: Hospital<br>Universitario la Paz                          | CEIC Área 5: Hospital Universitario<br>la Paz, Paseo de la Castellana, 261,<br>28036, Madrid, Spain                                                     | Spain          |
| West Midlands: Coventry &<br>Warwickshire Research Ethics<br>Committee | West Midlands: Coventry &<br>Warwickshire Research Ethics<br>Committee, The Old Chapel, Royal<br>Standard Place, Nottingham, NG1<br>6FS, United Kingdom | United Kingdom |
| West Midlands: Coventry &<br>Warwickshire Research Ethics<br>Committee | West Midlands: Coventry &<br>Warwickshire Research Ethics<br>Committee, The Old Chapel, Royal<br>Standard Place, Nottingham, NG1<br>6FS, United Kingdom | United Kingdom |
| West Midlands: Coventry &<br>Warwickshire Research Ethics<br>Committee | West Midlands: Coventry &<br>Warwickshire Research Ethics<br>Committee, The Old Chapel, Royal<br>Standard Place, Nottingham, NG1<br>6FS, United Kingdom | United Kingdom |
| West Midlands: Coventry &<br>Warwickshire Research Ethics<br>Committee | West Midlands: Coventry &<br>Warwickshire Research Ethics<br>Committee, The Old Chapel, Royal<br>Standard Place, Nottingham, NG1<br>6FS, United Kingdom | United Kingdom |
| West Midlands: Coventry &<br>Warwickshire Research Ethics<br>Committee | West Midlands: Coventry &<br>Warwickshire Research Ethics<br>Committee, The Old Chapel, Royal<br>Standard Place, Nottingham, NG1<br>6FS, United Kingdom | United Kingdom |
| West Midlands: Coventry &<br>Warwickshire Research Ethics<br>Committee | West Midlands: Coventry &<br>Warwickshire Research Ethics<br>Committee, The Old Chapel, Royal<br>Standard Place, Nottingham, NG1<br>6FS, United Kingdom | United Kingdom |
| West Midlands: Coventry &<br>Warwickshire Research Ethics<br>Committee | West Midlands: Coventry &<br>Warwickshire Research Ethics<br>Committee, The Old Chapel, Royal<br>Standard Place, Nottingham, NG1<br>6FS, United Kingdom | United Kingdom |
| West Midlands: Coventry &<br>Warwickshire Research Ethics<br>Committee | West Midlands: Coventry &<br>Warwickshire Research Ethics<br>Committee, The Old Chapel, Royal<br>Standard Place, Nottingham, NG1<br>6FS, United Kingdom | United Kingdom |

|                                  |                                                                                                                                                    |               |
|----------------------------------|----------------------------------------------------------------------------------------------------------------------------------------------------|---------------|
| Advarra                          | Advarra, 6940 Columbia Gateway Drive, Columbia, MD, 21046, United States                                                                           | United States |
| Advarra                          | Advarra, 6940 Columbia Gateway Drive, Columbia, MD, 21046, United States                                                                           | United States |
| Advarra                          | Advarra, 6940 Columbia Gateway Drive, Columbia, MD, 21046, United States                                                                           | United States |
| Advarra                          | Advarra, 6940 Columbia Gateway Drive, Columbia, MD, 21046, United States                                                                           | United States |
| Advarra                          | Advarra, 6940 Columbia Gateway Drive, Columbia, MD, 21046, United States                                                                           | United States |
| Advarra                          | Advarra, 6940 Columbia Gateway Drive, Columbia, MD, 21046, United States                                                                           | United States |
| Advarra                          | Advarra, 6940 Columbia Gateway Drive, Columbia, MD, 21046, United States                                                                           | United States |
| Sharp HealthCare                 | Sharp HealthCare, IRB, 7930 Frost Street, Suite 300, San Diego, CA, 92123, United States                                                           | United States |
| Rush University Medical Center   | Rush University Medical Center Institutional Review Board, 1653 West Congress Parkway, Jelke Building Room 1591, Chicago, IL, 60612, United States | United States |
| Cleveland Clinic                 | Cleveland Clinic, Institutional Review Board, 10681 Carnegie Ave, OS-1, Cleveland, OH, 44195, United States                                        | United States |
| Advarra                          | Advarra, 6940 Columbia Gateway Drive, Columbia, MD, 21046, United States                                                                           | United States |
| Advarra                          | Advarra, 6940 Columbia Gateway Drive, Columbia, MD, 21046, United States                                                                           | United States |
| Providence St. Joseph Health IRB | Providence St. Joseph Health IRB, 1801 Lind Ave SW, Renton, WA, 98057, United States                                                               | United States |
| Advarra                          | Advarra, 6940 Columbia Gateway Drive, Columbia, MD, 21046, United States                                                                           | United States |
| Duke University                  | Duke University; DUHS Institutional Review Board, Hock Plaza, 2424 Erwin Rd, Durham, NC, United States                                             | United States |

|                  |                                                                                                                      |               |
|------------------|----------------------------------------------------------------------------------------------------------------------|---------------|
| Bronx VAMC IRB   | Bronx VAMC IRB, 130 West Kingsbridge Road, 2Fo1 Research & Development, Bronx, NY, 10468, United States              | United States |
| Advarra          | Advarra, 6940 Columbia Gateway Drive, Columbia, MD, 21046, United States                                             | United States |
| Univ. of Chicago | Univ of Chicago, Institutional Review Board, 5841 S. Maryland Ave., MC7132, I-625, Chicago, IL, 60637, United States | United States |

## **Appendix 2. Propensity Score Matching Methods**

Data from the tocilizumab 8-mg/kg arm of MARIPOSA were analyzed and compared with data from the placebo arm of COVACTA, followed by sensitivity analysis including pooled data from the tocilizumab 8-mg/kg and 4-mg/kg arms of MARIPOSA. Inclusion criteria were matched, and the subset of patients with severe disease in MARIPOSA (similar to the COVACTA population) was included but patients with moderate disease were excluded. Propensity scores were calculated based on the following covariates, which could impact treatment assignment or outcome: ordinal baseline score (captures mechanical ventilation status), age, sex, antiviral use (yes/no), and corticosteroid use (yes/no). Overlapping support was checked for the propensity score distributions. Matching was performed using the MatchIt (version 3.0.2) algorithm, which matched the treatment groups from MARIPOSA and the control group from COVACTA using propensity scores with the nearest neighbor algorithm. Weighting was performed using inverse probability weighting according to the ATT estimand (1). Success of weighting and matching was assessed using Love plots, which chart the standardized differences of variables (standardized mean difference [SMD] =  $x_{\text{treatment}} - x_{\text{control}} / (\text{pooled standard deviation})$ ), where  $\text{SMD} < 0.1$  or  $\text{SMD} < 0.25$  was considered acceptable (2, 3), and histograms (for categorical variables) or density plots (for continuous variables) before and after weighting were used for visual comparison. Several methods were used to estimate the treatment difference for subgroup analysis and the interaction term between the continuous predictive biomarker and treatment: ATT estimand via propensity score weighting (primary analysis method), propensity score regression, naive, propensity score matching.

**Table S1. Baseline Characteristics of Patients in MARIPOSA****(severe disease subset) and COVACTA**

|                                      | <b>COVACTA</b><br><i>N</i> = 437 | <b>MARIPOSA</b><br><i>N</i> = 77 |
|--------------------------------------|----------------------------------|----------------------------------|
| Mechanical ventilation, <i>n</i> (%) |                                  |                                  |
| No                                   | 270 (61.8)                       | 65 (84.4)                        |
| Yes                                  | 167 (38.2)                       | 12 (15.6)                        |
| Ordinal scale category, <i>n</i> (%) |                                  |                                  |
| 2                                    | 15 (3.4)                         | 2 (2.6)                          |
| 3                                    | 122 (27.9)                       | 22 (28.6)                        |
| 4                                    | 133 (30.4)                       | 41 (53.2)                        |
| 5                                    | 60 (13.7)                        | 9 (11.7)                         |
| 6                                    | 107 (24.5)                       | 3 (3.9)                          |
| Sex, <i>n</i> (%)                    |                                  |                                  |
| Female                               | 136 (30.2)                       | 29 (37.7)                        |
| Male                                 | 315 (69.8)                       | 48 (62.3)                        |
| Age                                  |                                  |                                  |
| Mean (SD)                            | 61.0 (14.3)                      | 59.1 (14.4)                      |
| Median                               | 63                               | 60                               |
| Q1–Q3                                | 53–71                            | 50–70                            |
| Min–Max                              | 22–96                            | 27–91                            |
| Antiviral use, <i>n</i> (%)          |                                  |                                  |
| No                                   | 336 (74.5)                       | 41 (53.2)                        |
| Yes                                  | 115 (25.5)                       | 36 (46.8)                        |
| Steroid use, <i>n</i> (%)            |                                  |                                  |
| No                                   | 353 (78.3)                       | 57 (74.0)                        |
| Yes                                  | 98 (21.7)                        | 20 (26.0)                        |

One patient who had an ordinal scale score of 7 at baseline (death) was excluded from the analysis. Q = quarter.



**Table S2. Combinations of Predictive Biomarkers**

| <b>Biomarker Combination</b>                                | <b>Estimate</b> | <b><i>p</i> Value</b> | <b>2.5%</b> | <b>97.5%</b> |
|-------------------------------------------------------------|-----------------|-----------------------|-------------|--------------|
| <b>Combined ferritin, IL-6, and CRP (<i>n</i> = 257)</b>    |                 |                       |             |              |
| Ferritin                                                    | 0.20            | 0.04                  | 0.04        | 0.87         |
| IL-6                                                        | 0.89            | 0.88                  | 0.18        | 3.97         |
| CRP                                                         | 0.48            | 0.42                  | 0.06        | 2.51         |
| Ferritin and IL-6                                           | 0.62            | 0.52                  | 0.14        | 2.69         |
| Ferritin and CRP                                            | 0.41            | 0.23                  | 0.09        | 1.73         |
| IL-6 and CRP                                                | 0.79            | 0.75                  | 0.18        | 3.32         |
| Ferritin or IL-6                                            | 0.48            | 0.16                  | 0.16        | 1.30         |
| Ferritin or CRP                                             | 0.40            | 0.09                  | 0.12        | 1.08         |
| IL-6 or CRP                                                 | 0.82            | 0.68                  | 0.29        | 2.09         |
| <b>Combined ferritin, LDH, and D-dimer (<i>n</i> = 165)</b> |                 |                       |             |              |
| Ferritin                                                    | 0.19            | 0.05                  | 0.03        | 0.99         |
| D-dimer                                                     | 1.16            | 0.86                  | 0.22        | 6.09         |
| LDH                                                         | 1.68            | 0.56                  | 0.29        | 9.61         |
| Ferritin and D-dimer                                        | 0.54            | 0.49                  | 0.09        | 3.13         |
| Ferritin and LDH                                            | 0.32            | 0.20                  | 0.05        | 1.83         |
| D-dimer and LDH                                             | 1.97            | 0.44                  | 0.36        | 11.46        |
| Ferritin or D-dimer                                         | 0.51            | 0.25                  | 0.16        | 1.56         |
| Ferritin or LDH                                             | 0.47            | 0.22                  | 0.14        | 1.51         |
| D-dimer or LDH                                              | 1.30            | 0.66                  | 0.40        | 4.07         |
| LDH and D-dimer and ferritin                                | 0.50            | 0.50                  | 0.06        | 3.93         |

A median cutoff value was used for each biomarker.

CRP = C-reactive protein; IL-6 = interleukin-6; LDH = lactate dehydrogenase.

**Table S3. Ferritin Levels According to Baseline Ordinal Scale**

| <b>Baseline Ordinal Scale Category</b> | <b>Mean</b> | <b>Median</b> | <b>25%</b> | <b>75%</b> | <b>Standard Deviation</b> | <b><i>n</i></b> |
|----------------------------------------|-------------|---------------|------------|------------|---------------------------|-----------------|
| 2                                      | 1135.88     | 640.17        | 201.78     | 2071.73    | 1036.74                   | 12              |
| 3                                      | 2126.42     | 1677.39       | 870.15     | 2798.08    | 1634.71                   | 104             |
| 4                                      | 3978.09     | 2422.27       | 1256.07    | 4458.50    | 7849.37                   | 103             |
| 5                                      | 4315.15     | 3148.05       | 1659.09    | 5207.03    | 3860.48                   | 54              |
| 6                                      | 3619.02     | 2464.96       | 1297.69    | 4392.89    | 4132.11                   | 91              |

Ferritin levels are shown as pmol/L.

**Table S4. D-Dimer Levels Among Survivors and Nonsurvivors  
in COVACTA and Published Studies**

|                  | Nonsurvivors |                            | Survivors |                            |
|------------------|--------------|----------------------------|-----------|----------------------------|
|                  | <i>N</i>     | Mean (IQR)<br>[median]     | <i>N</i>  | Mean (IQR)<br>[median]     |
| D-dimer, µg/mL*  |              |                            |           |                            |
| COVACTA          | 47           | 7.16 (1.02–8.37)<br>[2.68] | 150       | 3.58 (0.63–2.32)<br>[1.13] |
| Zhou F et al (4) | 54           | 5.2 (1.5–21.1)<br>[NR]     | 137       | 0.6 (0.3–1.0)<br>[NR]      |
| Tang N et al (5) | 21           | 2.12 (0.77–5.27)<br>[NR]   | 162       | 0.61 (0.35–1.29)<br>[NR]   |

\*Reported as fibrinogen equivalent units for COVACTA, though published studies do not state whether D-dimer was reported as fibrinogen equivalent units or D-dimer units.

IQR = interquartile range; NR = not reported.

**Figure S1.** Baseline biomarker levels. (A) Overall and (B) by treatment arm. (C) Correlation between baseline biomarkers. Ferritin, neutrophil-to-lymphocyte ratio, IL-6, D-dimer, absolute lymphocyte, and absolute leukocyte values are log transformed. IL-6 = interleukin-6.

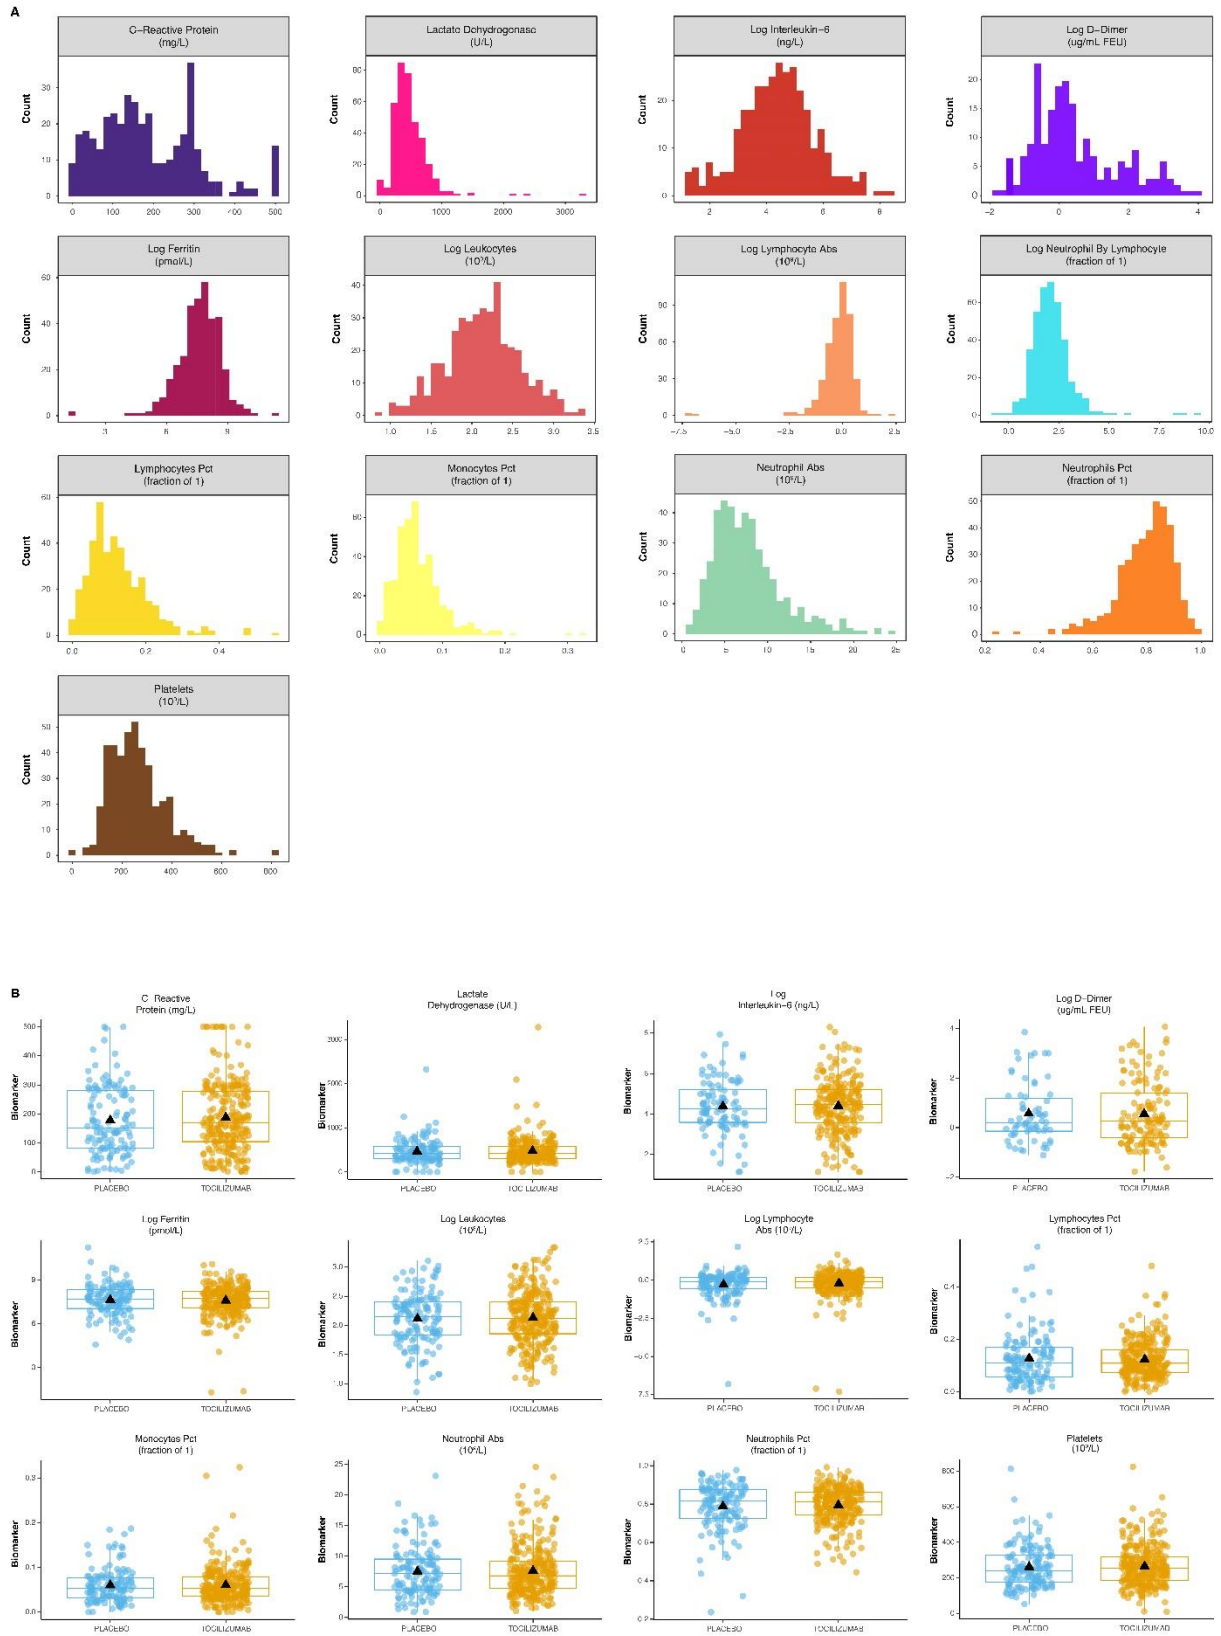

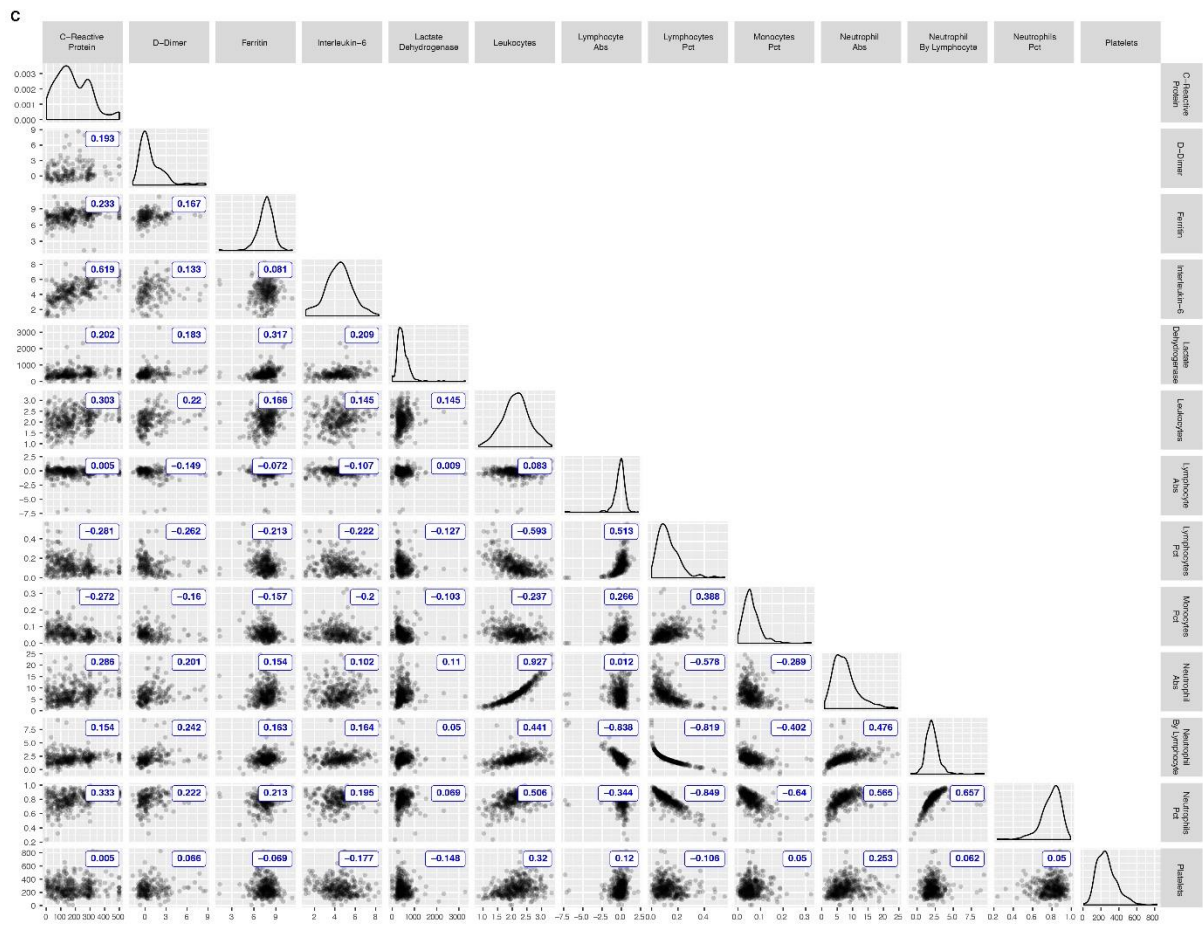

**Figure S2.** Prognostic forest plots. (A) Ordinal scale and (B) time to hospital discharge.

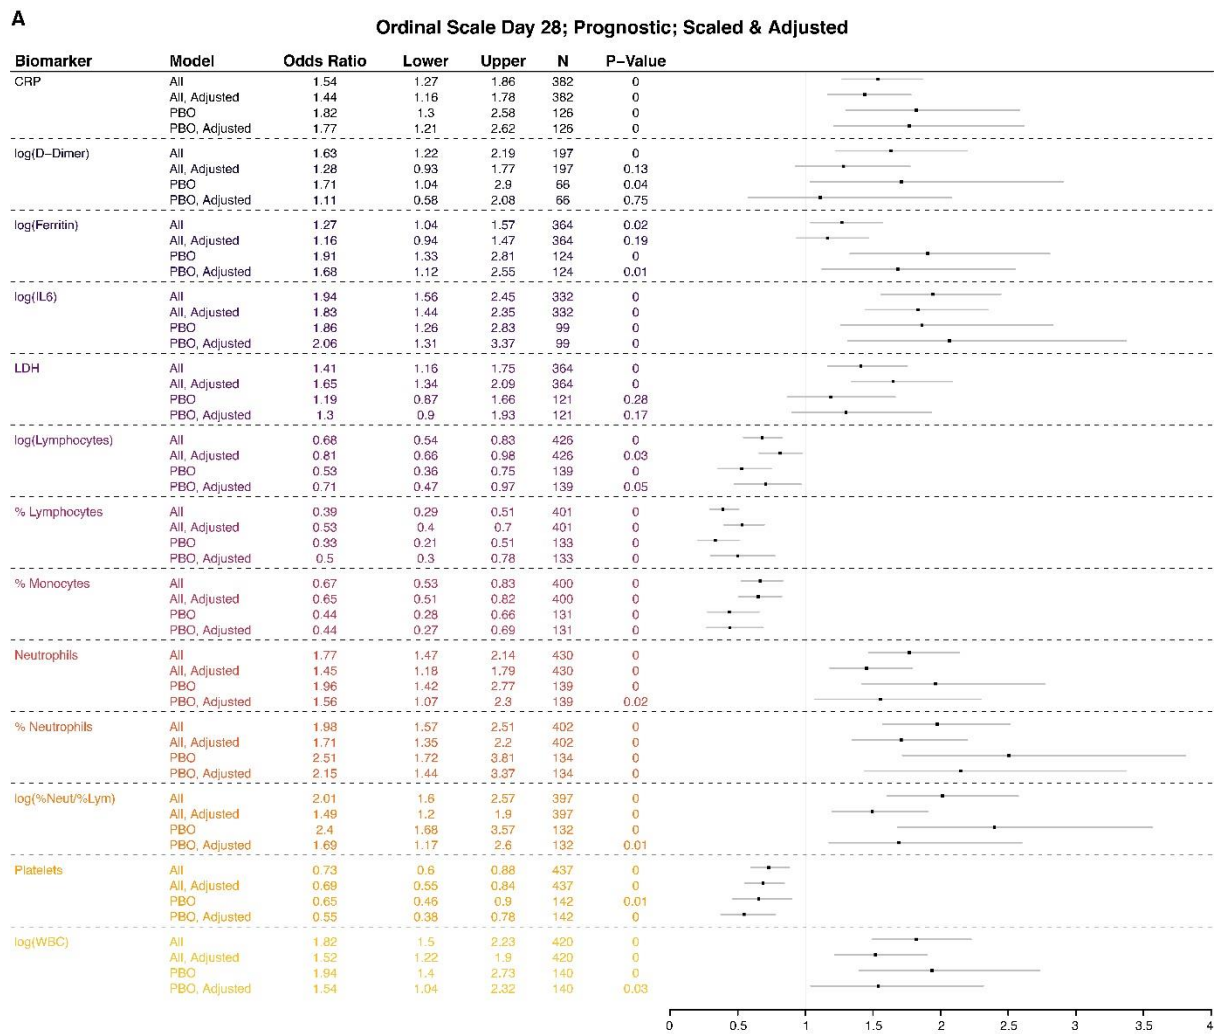

**B**

**Time to Hospital Discharge (Fine-Gray); Prognostic; Scaled & Adjusted**

| Biomarker        | Model         | Hazard Ratio | Lower | Upper | N   | P-Value |
|------------------|---------------|--------------|-------|-------|-----|---------|
| CRP              | All           | 0.68         | 0.6   | 0.78  | 382 | 0       |
|                  | All, Adjusted | 0.73         | 0.63  | 0.85  | 382 | 0       |
|                  | PBO           | 0.58         | 0.44  | 0.75  | 126 | 0       |
|                  | PBO, Adjusted | 0.61         | 0.47  | 0.8   | 126 | 0       |
| log(D-Dimer)     | All           | 0.67         | 0.54  | 0.84  | 197 | 0       |
|                  | All, Adjusted | 0.83         | 0.68  | 1.02  | 197 | 0.08    |
|                  | PBO           | 0.68         | 0.44  | 1.06  | 66  | 0.09    |
|                  | PBO, Adjusted | 0.84         | 0.57  | 1.25  | 66  | 0.4     |
| log(Ferritin)    | All           | 0.83         | 0.72  | 0.96  | 364 | 0.02    |
|                  | All, Adjusted | 0.84         | 0.73  | 0.97  | 364 | 0.02    |
|                  | PBO           | 0.65         | 0.53  | 0.81  | 124 | 0       |
|                  | PBO, Adjusted | 0.74         | 0.58  | 0.93  | 124 | 0.01    |
| log(IL6)         | All           | 0.64         | 0.56  | 0.74  | 332 | 0       |
|                  | All, Adjusted | 0.56         | 0.47  | 0.68  | 332 | 0       |
|                  | PBO           | 0.6          | 0.43  | 0.83  | 99  | 0       |
|                  | PBO, Adjusted | 0.47         | 0.3   | 0.73  | 99  | 0       |
| LDH              | All           | 0.71         | 0.59  | 0.85  | 364 | 0       |
|                  | All, Adjusted | 0.6          | 0.48  | 0.75  | 364 | 0       |
|                  | PBO           | 0.85         | 0.65  | 1.12  | 121 | 0.25    |
|                  | PBO, Adjusted | 0.81         | 0.58  | 1.13  | 121 | 0.21    |
| log(Lymphocytes) | All           | 1.44         | 1.16  | 1.8   | 426 | 0       |
|                  | All, Adjusted | 1.4          | 1.08  | 1.83  | 426 | 0.01    |
|                  | PBO           | 2.14         | 1.66  | 2.76  | 139 | 0       |
|                  | PBO, Adjusted | 1.73         | 1.32  | 2.28  | 139 | 0       |
| % Lymphocytes    | All           | 1.63         | 1.45  | 1.82  | 401 | 0       |
|                  | All, Adjusted | 1.46         | 1.32  | 1.63  | 401 | 0       |
|                  | PBO           | 1.69         | 1.4   | 2.05  | 133 | 0       |
|                  | PBO, Adjusted | 1.49         | 1.26  | 1.77  | 133 | 0       |
| % Monocytes      | All           | 1.19         | 1.04  | 1.36  | 400 | 0.01    |
|                  | All, Adjusted | 1.19         | 1     | 1.41  | 400 | 0.05    |
|                  | PBO           | 1.64         | 1.31  | 2.05  | 131 | 0       |
|                  | PBO, Adjusted | 1.69         | 1.36  | 2.1   | 131 | 0       |
| Neutrophils      | All           | 0.58         | 0.49  | 0.69  | 430 | 0       |
|                  | All, Adjusted | 0.73         | 0.61  | 0.87  | 430 | 0       |
|                  | PBO           | 0.42         | 0.3   | 0.59  | 139 | 0       |
|                  | PBO, Adjusted | 0.54         | 0.37  | 0.77  | 139 | 0       |
| % Neutrophils    | All           | 0.66         | 0.58  | 0.74  | 402 | 0       |
|                  | All, Adjusted | 0.68         | 0.6   | 0.76  | 402 | 0       |
|                  | PBO           | 0.6          | 0.49  | 0.74  | 134 | 0       |
|                  | PBO, Adjusted | 0.64         | 0.53  | 0.76  | 134 | 0       |
| log(%Neut/%Lym)  | All           | 0.5          | 0.41  | 0.61  | 397 | 0       |
|                  | All, Adjusted | 0.6          | 0.48  | 0.75  | 397 | 0       |
|                  | PBO           | 0.41         | 0.31  | 0.55  | 132 | 0       |
|                  | PBO, Adjusted | 0.51         | 0.39  | 0.67  | 132 | 0       |
| Platelets        | All           | 1.14         | 1.01  | 1.27  | 437 | 0.03    |
|                  | All, Adjusted | 1.16         | 1.04  | 1.29  | 437 | 0.01    |
|                  | PBO           | 1.2          | 1     | 1.45  | 142 | 0.05    |
|                  | PBO, Adjusted | 1.2          | 1     | 1.44  | 142 | 0.05    |
| log(WBC)         | All           | 0.85         | 0.58  | 0.74  | 420 | 0       |
|                  | All, Adjusted | 0.78         | 0.68  | 0.9   | 420 | 0       |
|                  | PBO           | 0.55         | 0.44  | 0.69  | 140 | 0       |
|                  | PBO, Adjusted | 0.69         | 0.54  | 0.89  | 140 | 0       |

**Figure S3.** Predictive forest (tertiles and continuous analysis) plots. (A) Ordinal scale and (B) time to hospital discharge.

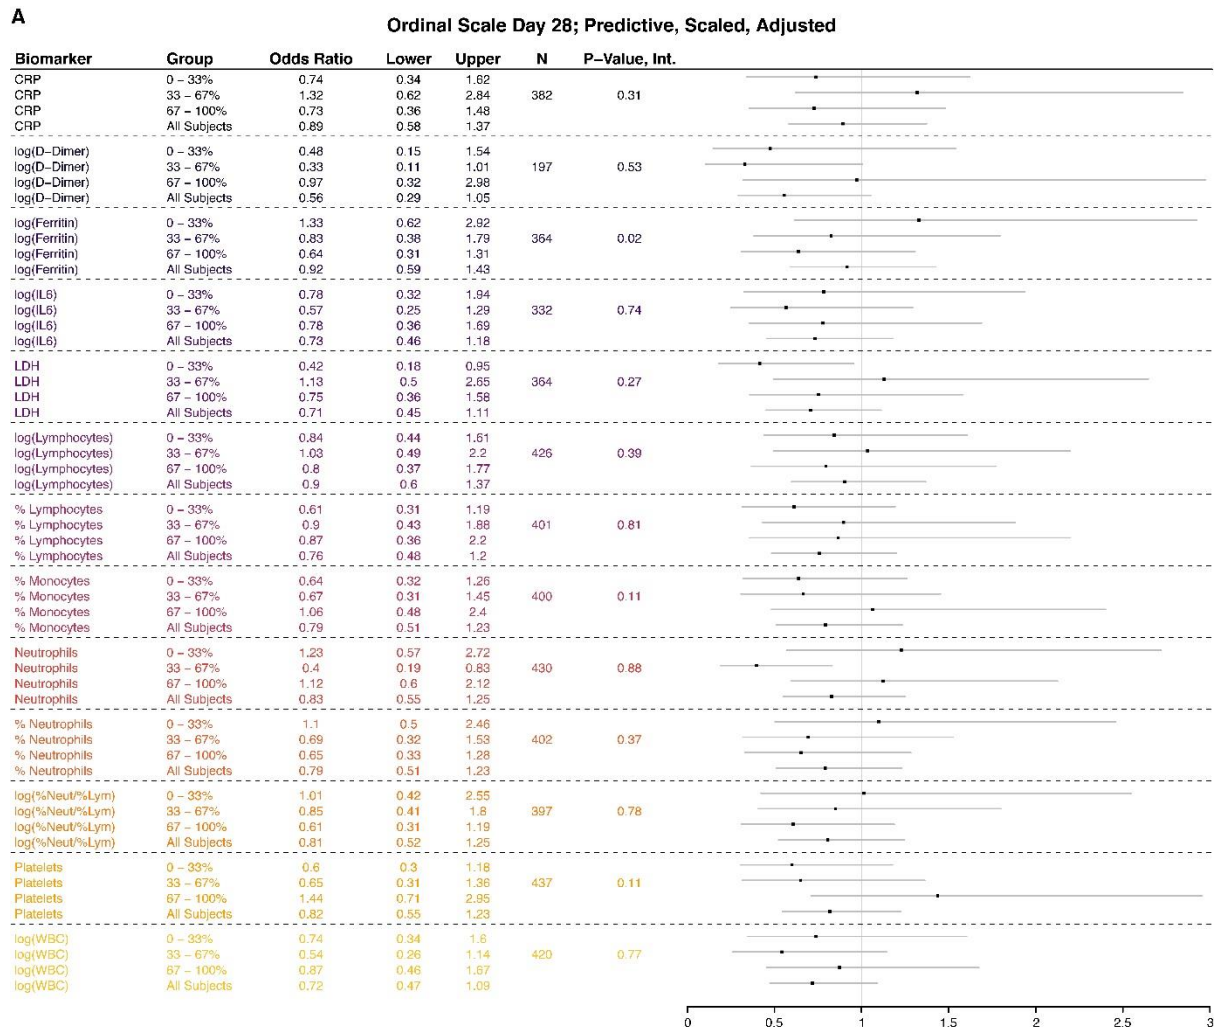



**B**

**Time to Hospital Discharge; Fine Gray; Predictive, Scaled, Adjusted**

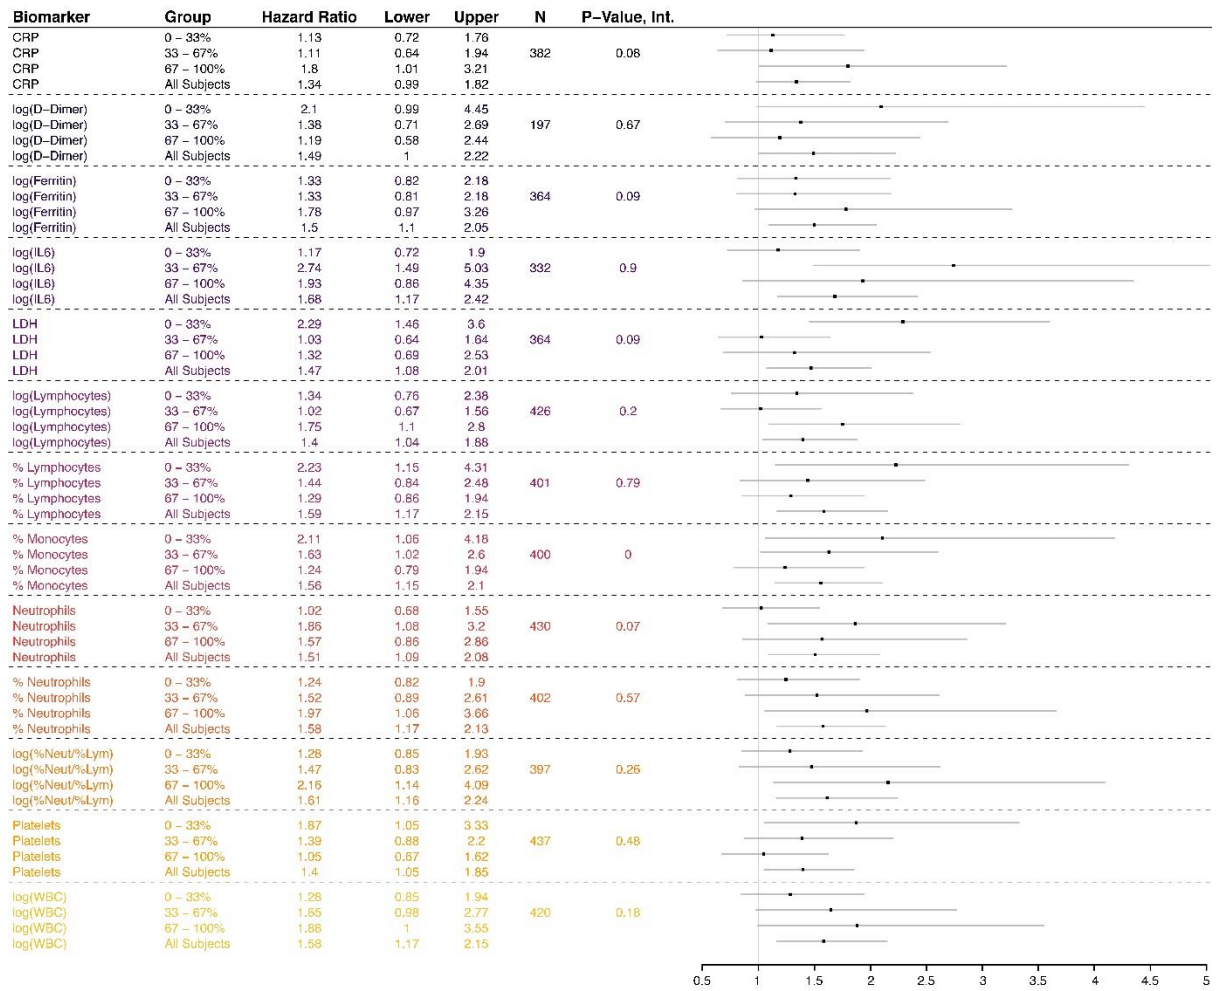

**Figure S4.** (A) Ferritin as a predictive biomarker for death by day 28 in combined analysis of COVACTA and MARIPOSA. (B) Baseline ferritin levels in MARIPOSA and COVACTA. (C) Love plot showing the standardized mean difference using matched subjects, unadjusted, and ATT weights. (D) Descriptive plot of subgroups of patients receiving or not receiving mechanical ventilation in MARIPOSA and COVACTA. (A, D) Data are shown as mean  $\pm$  standard error based on 124 patients from the placebo arm of COVACTA and 67 patients from the tocilizumab 4-mg/kg and 8-mg/kg arms of MARIPOSA. BAVT = baseline antiviral treatment; MVB = mechanical ventilation at baseline; PBO = placebo.

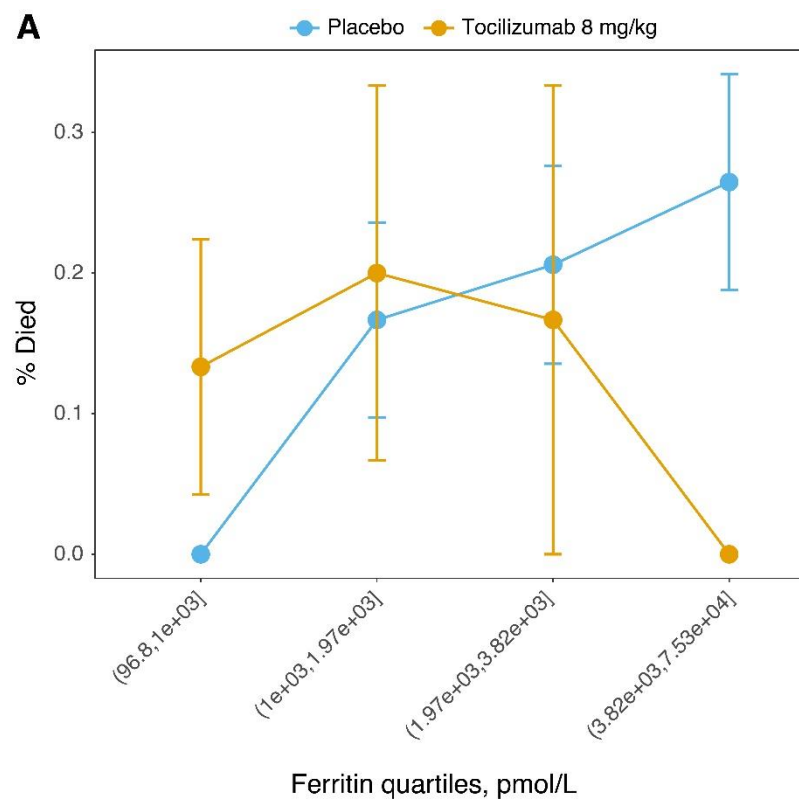

**B**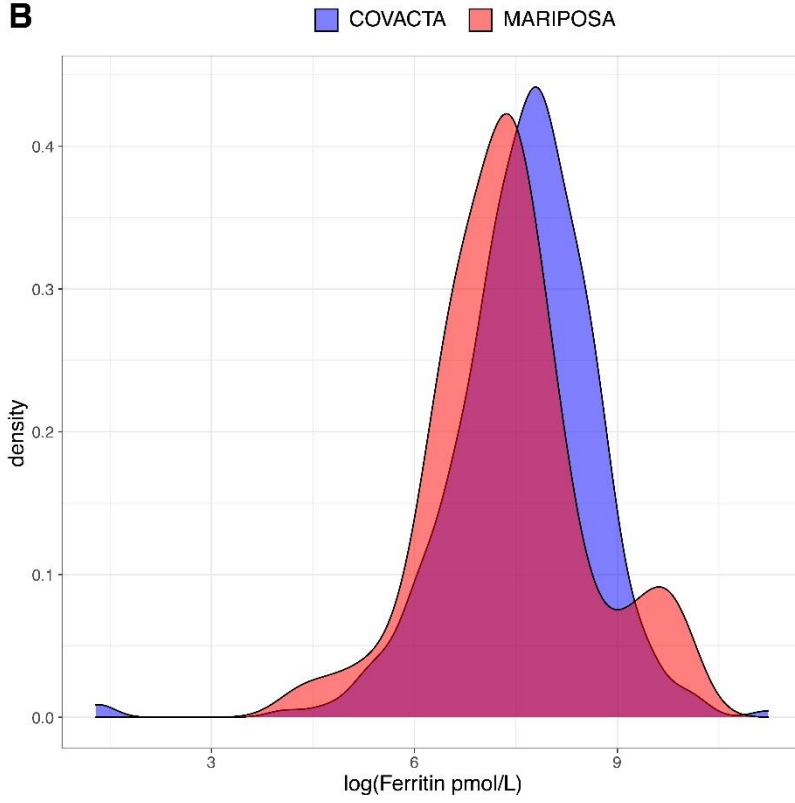**C**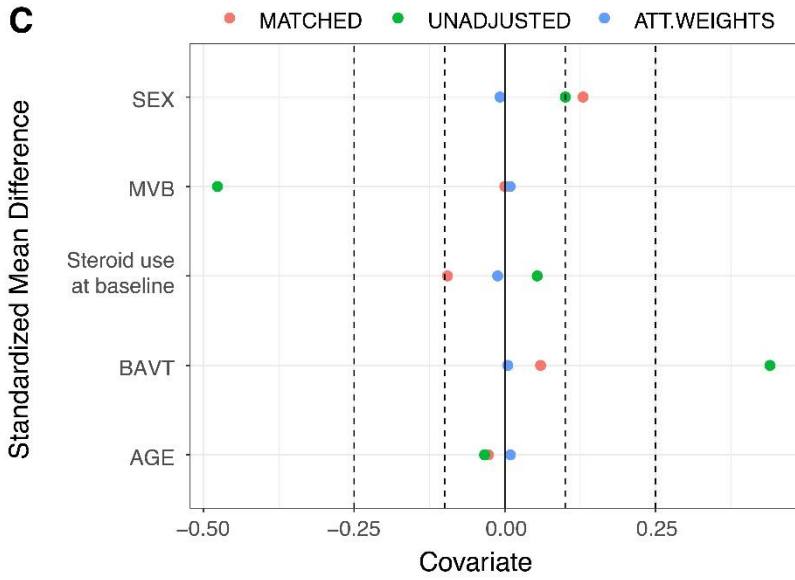

**D**

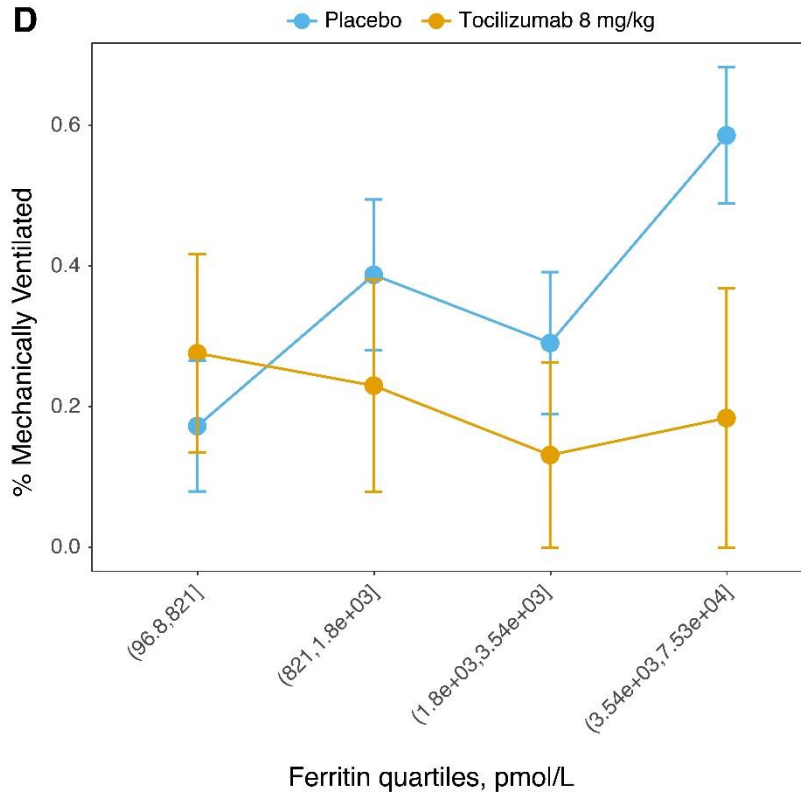

**Figure S5.** Day 28 outcomes by baseline IL-6 tertiles (mITT population). (A) Ordinal scale category and (B) death. Seven-category ordinal scale: 1, discharged or ready for discharge; 2, non-ICU hospital ward, not requiring supplemental oxygen; 3, non-ICU hospital ward, requiring supplemental oxygen; 4, ICU or non-ICU hospital ward, requiring noninvasive ventilation or high-flow oxygen; 5, ICU, requiring intubation and mechanical ventilation; 6, ICU, requiring extracorporeal membrane oxygenation or mechanical ventilation and additional organ support; 7, death. IL-6 values are log-transformed. ICU = intensive care unit; IL-6 = interleukin-6.

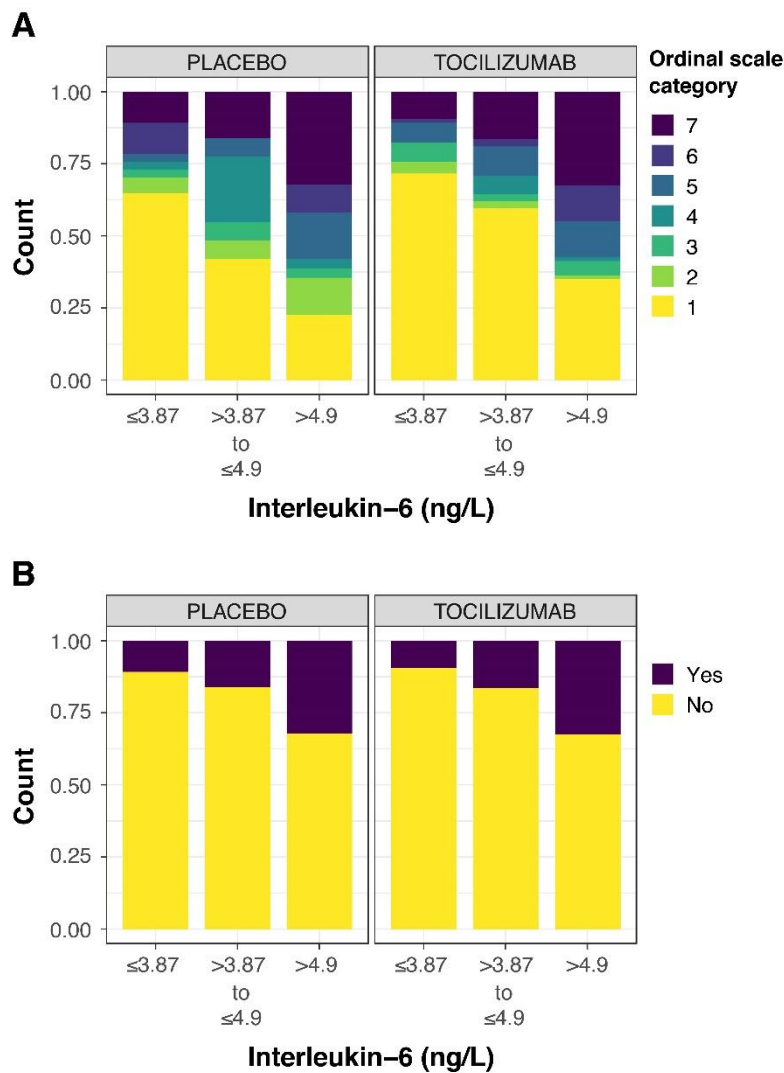

**Figure S6.** Unmodeled data by ferritin quartiles (A) in all-comers ( $N = 437$ ) and (B) in the subgroup of patients requiring positive pressure or mechanical ventilation at baseline (ordinal scale categories 4 and 5) ( $n = 157$ ). (C) Baseline ordinal scale versus baseline ferritin levels. (A, B) Data are shown as descriptive mean  $\pm$  SE. (C) The blue line shows Loess smoothing. SE = standard error.

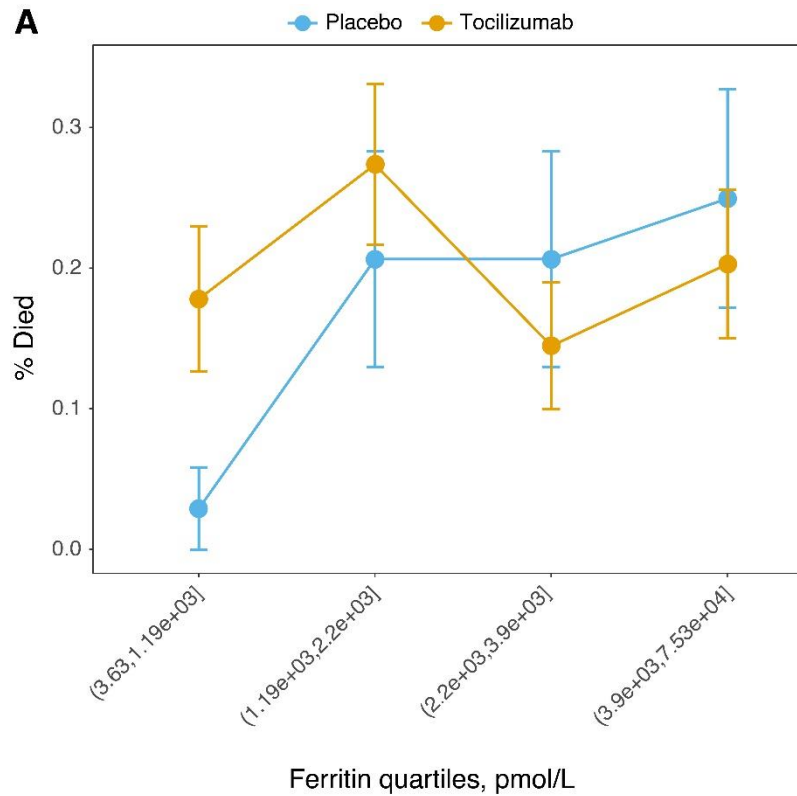

**B**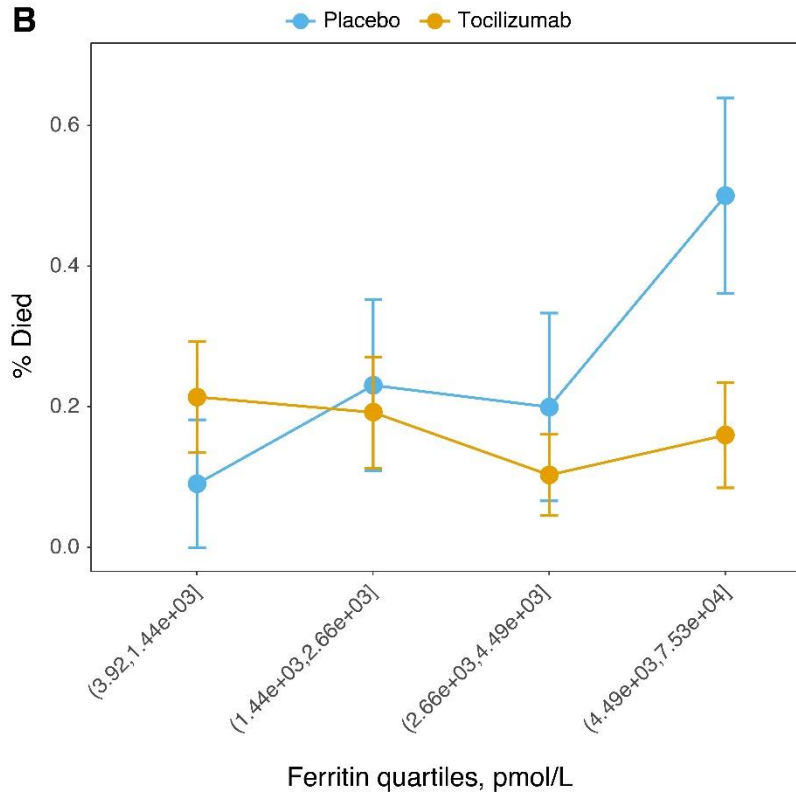**C**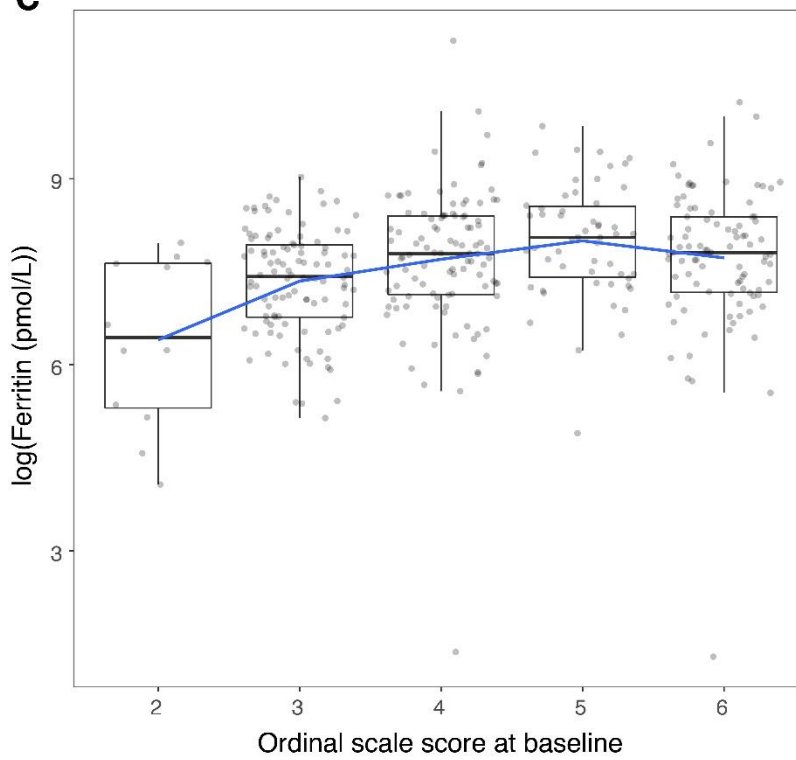

**Figure S7.** (A) Prognostic models and (B) predictive models for clinical outcomes by biomarkers and by ferritin tertiles (C, ordinal scale score; D, mechanical ventilation status; E, mortality; F, hospital discharge) in the subgroup of patients requiring positive pressure or mechanical ventilation at baseline (ordinal scale categories 4 and 5) ( $n = 157$ ). Seven-category ordinal scale: 1, discharged or ready for discharge; 2, non-ICU hospital ward, not requiring supplemental oxygen; 3, non-ICU hospital ward, requiring supplemental oxygen; 4, ICU or non-ICU hospital ward, requiring noninvasive ventilation or high-flow oxygen; 5, ICU, requiring intubation and mechanical ventilation; 6, ICU, requiring extracorporeal membrane oxygenation or mechanical ventilation and additional organ support; 7, death. ICU = intensive care unit.

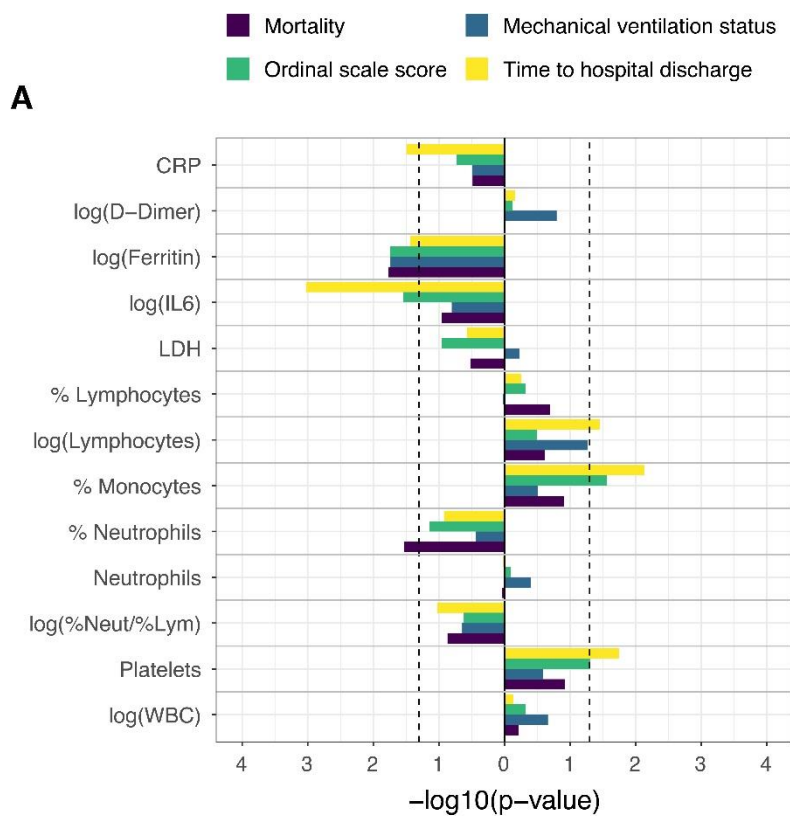



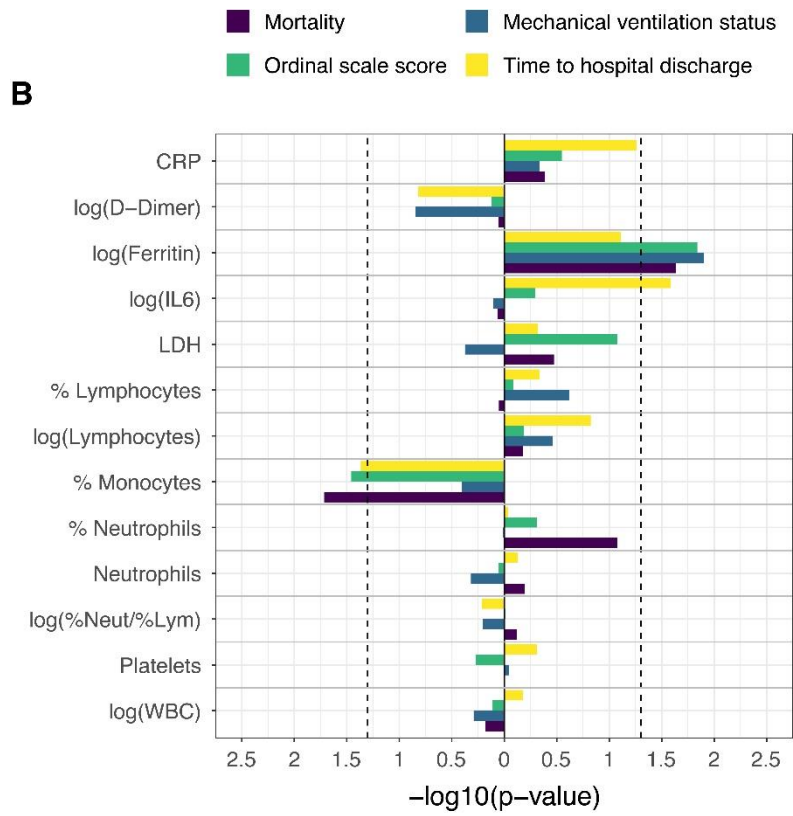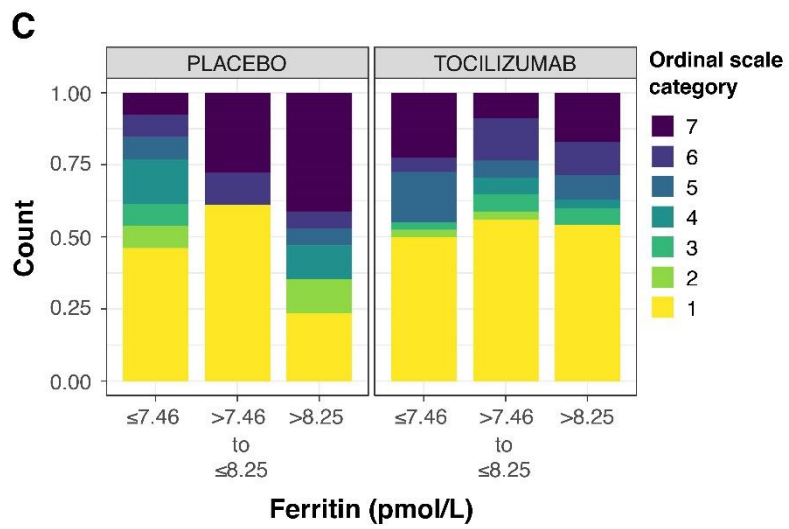

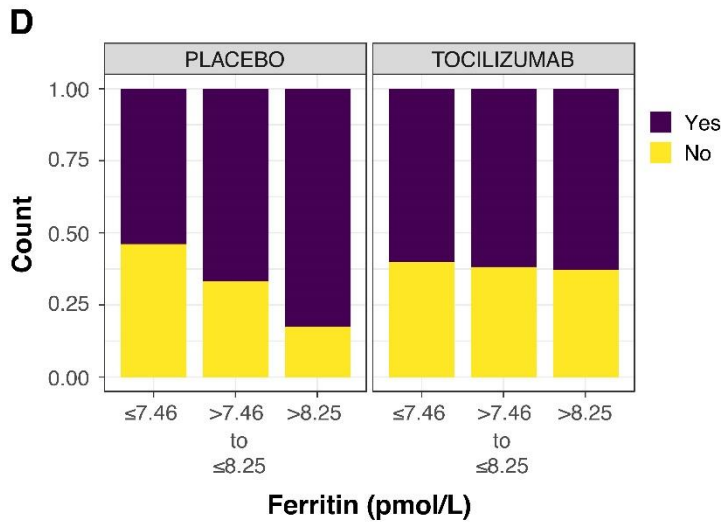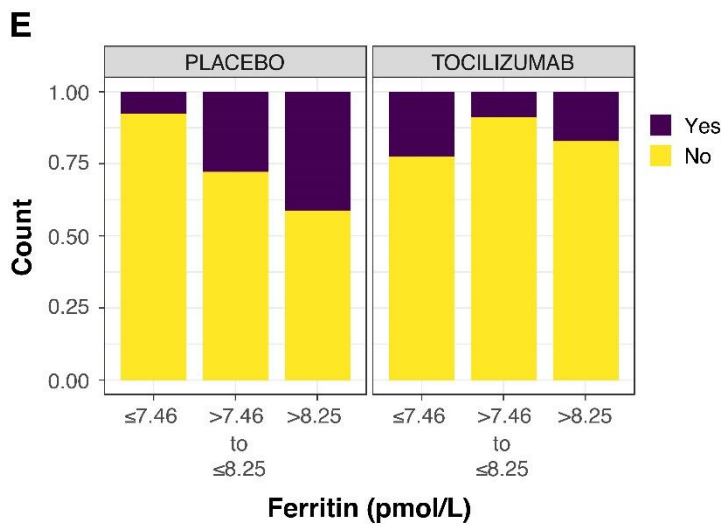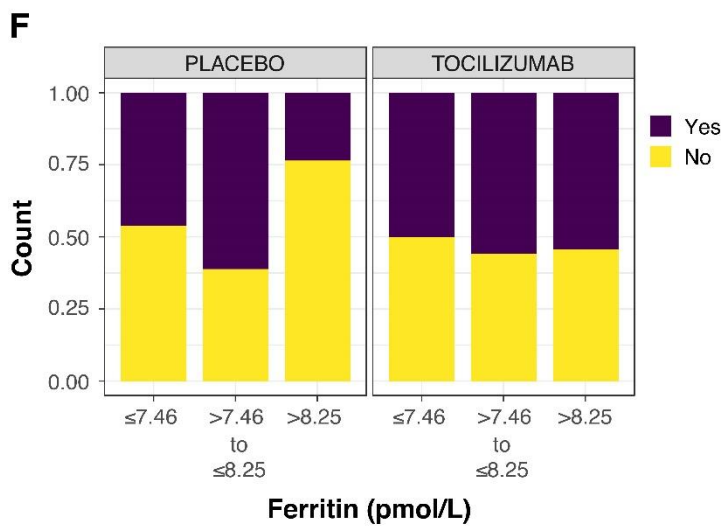

**Figure S8.** Cumulative probability of time to discharge and death by day 28 according to baseline IL-6 concentration in patients requiring positive pressure or mechanical ventilation at baseline (ordinal scale categories 4 and 5) ( $n = 157$ ). IL-6 values are log transformed. A cutoff IL-6 value of 80 ng/L was chosen for visualization purposes only (C) based on the median (IQR) value of 85.8 (35.6–188.0) ng/mL. IL-6 = interleukin-6; IQR = interquartile range.

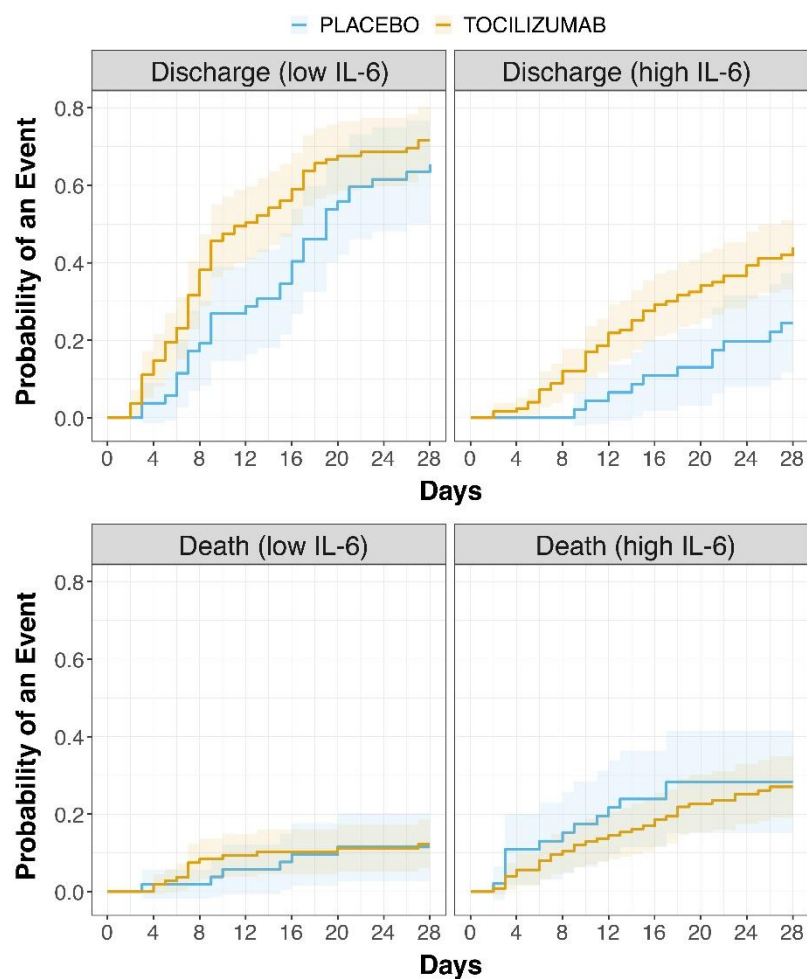

## SUPPLEMENTARY REFERENCES

1. Li F, Morgan KL, Zaslavsky AM: Balancing covariates via propensity score weighting. *J Am Stat Assoc* 2018; 113:390–400.
2. Stuart EA, Lee BK, Leacy FP: Prognostic score-based balance measures can be a useful diagnostic for propensity score methods in comparative effectiveness research. *J Clin Epidemiol* 2013; 66(suppl):S84–S90.e1.
3. Austin PC, Stuart EA: Moving towards best practice when using inverse probability of treatment weighting (IPTW) using the propensity score to estimate causal treatment effects in observational studies. *Stat Med* 2015; 34:3661–3679.
4. Zhou F, Yu T, Du R, et al: Clinical course and risk factors for mortality of adult inpatients with COVID-19 in Wuhan, China: a retrospective cohort study. *Lancet* 2020; 395:1054–1062.
5. Tang N, Li D, Wang X, Sun Z: Abnormal coagulation parameters are associated with poor prognosis in patients with novel coronavirus pneumonia. *J Thromb Haemost* 2020; 18:844–847.
